# Supplementary material for: Preparation of Heterojunctions Based on Cs<sub>3</sub>Bi<sub>2</sub>Br<sub>9</sub> Nanocrystals and G-C<sub>3</sub>N<sub>4</sub> Nanosheets for Photocatalytic Hydrogen Evolution
Source: Preprints.org preprint supplement (doi:10.20944/preprints202211.0524.v1), 2022-11-29
Supplement: Supplementary file 1 [file supplementary]

**Supporting information**

**Preparation of heterojunctions based on Cs3Bi2Br9 nanocrystals and g-C3N4 nanosheets for photocatalytic hydrogen evolution**

María Medina-Llamasa,b,*, Andrea Speltinia, Antonella Profumoa, Francesca Panzarea,c Antonella Milella,c Francesco Fracassi, c,d Andrea Listortic and Lorenzo Malavasia*

a Unidad Académica Preparatoria, Plantel II, Universidad Autónoma de Zacatecas, Zacatecas, 98068, México.

b Department of Chemistry, University of Pavia, Via 12 Taramelli 12, 27100 Pavia, Italy.

c Department of Chemistry, University of Bari “Aldo Moro” via Orabona 4, Bari 70126, Italy.

d National Research Council, Institute of Nanotechnology (CNR-NANOTEC), Department of Chemistry, 70125 Bari, Italy.

| 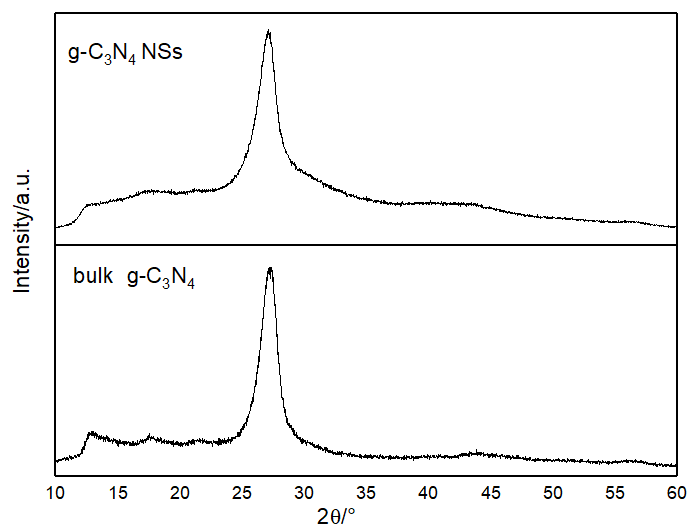 |
| --- |
| **Figure S1.** XRD pattern of the bulk g-C3N4 and the g-C3N4 nanosheets. |
| 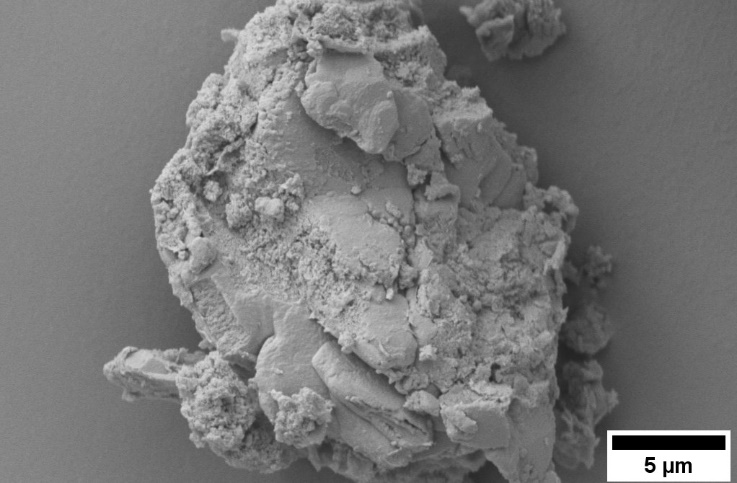 |
| **Figure S2.** SEM micrograph of the bulk g-C3N4. |
| 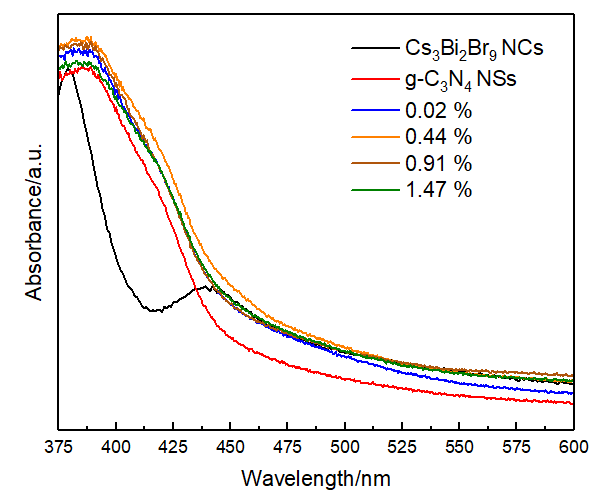 |
| **Figure S3.** Absorbance spectra versus wavelength of the g-C3N4 NSs, the Cs3Bi2Br9 NCs andthe Cs3Bi2Br9/g-C3N4 NSs composites produced at different percentages of perovskite loading (% *wt.*) |
| 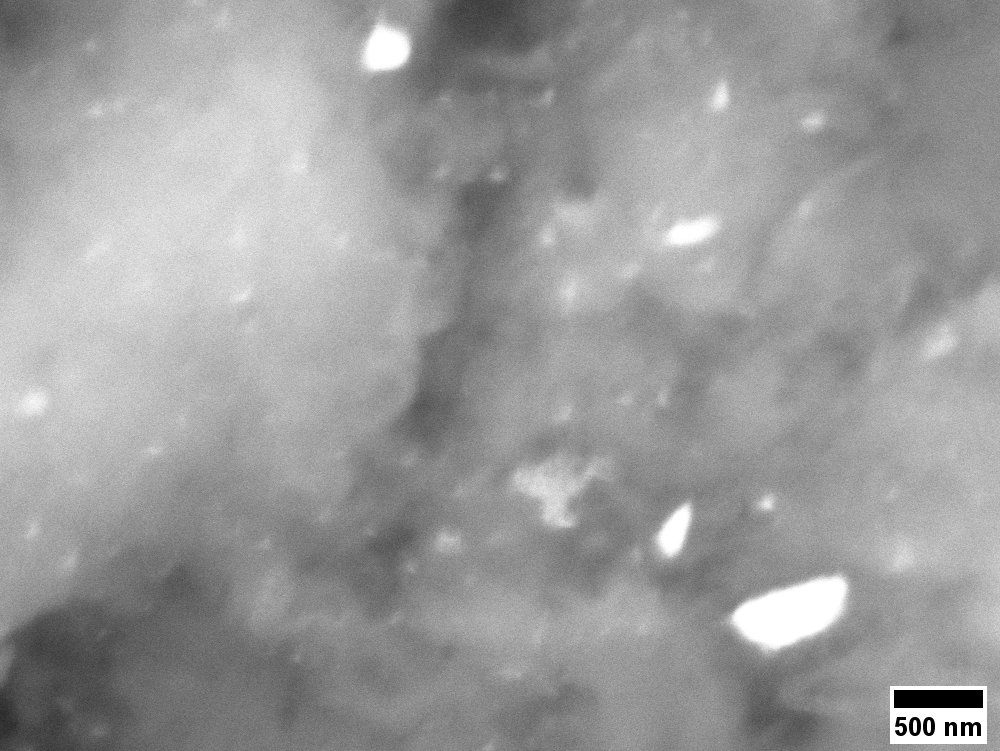 |
| **Figure S4.** BSE-HRSEM micrograph of the 0.44 % *wt.* Cs3Bi2Br9 NCs/g-C3N4 NS. |
